1 Full Title: High affinity Na<sup>+</sup> transport by wheat HKT1;5 is blocked by K<sup>+</sup>

2

3 Running title: HKT1;5 proteins catalyse dual affinity Na<sup>+</sup> transporter in wheat

4 Authors: Bo Xu<sup>1,2</sup>, Maria Hrmova<sup>2</sup> and Matthew Gilliam<sup>1,2\*</sup>

5

6 <sup>1</sup>Australian Research Council Centre of Excellence in Plant Energy Biology,

7 University of Adelaide, Waite Research Precinct, Glen Osmond, South Australia

8 5064, Australia

9

10 <sup>2</sup>School of Agriculture, Food and Wine, and Waite Research Institute, University of

11 Adelaide, Waite Research Precinct, Glen Osmond, South Australia 5064, Australia

12

13 \*Corresponding author: e-mail: [matthew.gilliam@adelaide.edu.au](mailto:matthew.gilliam@adelaide.edu.au)

14

15

16

17

18 **Abstract**

19 The wheat sodium transporters TmHKT1;5-A and TaHKT1;5-D are encoded by  
20 genes underlying major shoot Na<sup>+</sup> exclusion loci *Nax2* and *Kna1* from *Triticum*  
21 *monococcum* (Tm) and *Triticum aestivum* (Ta), respectively. In contrast to HKT2  
22 transporters that have been shown to exhibit high affinity K<sup>+</sup>-dependent Na<sup>+</sup> transport,  
23 HKT1 proteins have, with one exception, only been shown to catalyse low affinity  
24 Na<sup>+</sup> transport and no K<sup>+</sup> transport. Here, using heterologous expression in *Xenopus*  
25 *laevis* oocytes we show that both TmHKT1;5-A and TaHKT1;5-D encode dual (high  
26 and low) affinity Na<sup>+</sup>-transporters with the high-affinity component being abolished  
27 when external K<sup>+</sup> is in excess of external Na<sup>+</sup>. The low-affinity component for Na<sup>+</sup>  
28 transport of TmHKT1;5-A had a lower K<sub>m</sub> than that of TaHKT1;5-D even when  
29 blocked by external K<sup>+</sup>. We use 3-D structural modelling to explain how K<sup>+</sup> block  
30 may occur and propose potential physiological consequences of K<sup>+</sup> block. The  
31 transport properties and localisation of wheat HKT1;5 proteins are well suited for  
32 their role in a ‘gatekeeper’ process that secure shoot Na<sup>+</sup>-exclusion and underpin  
33 recent advances for improving crop plant salt tolerance.

34

35 Keywords: salinity; High-affinity K Transporters; HKT; wheat; membrane transport;  
36 crop; 3-D structural modelling

37

## 38 **Introduction**

39 Crops suffer reduced growth and productivity under salinity stress. Salt, when it  
40 builds up to high concentrations in the growing medium (i.e. soil solution) imposes an  
41 osmotic limitation on water uptake, interferes with optimal nutrient homeostasis, and  
42 leads to the build up of leaf cellular sodium ( $\text{Na}^+$ ) concentrations, which causes an  
43 ionic toxicity that limits photosynthesis and carbon assimilation in plants (Munns and  
44 Gilliam, 2015).

45

46 A major genetic mechanism contributing towards salinity tolerance of most crops  
47 including the cereals rice (*Oryza sativa*) and wheat (*Triticum aestivum* and *Triticum*  
48 *monococcum*) is  $\text{Na}^+$  exclusion from leaves, with the High-affinity potassium ( $\text{K}^+$ )  
49 transporter (HKT) protein family having a major role in this trait (Ren *et al.* 2005;  
50 James *et al.* 2006; Munns *et al.* 2012; Munns and Gilliam, 2015; Campbell *et al.*  
51 2017; Xu *et al.* 2018). This family of proteins are represented widely across the plant  
52 kingdom, and more broadly are members of the high affinity  $\text{K}^+/\text{Na}^+$  transporting  
53 Ktr/TrK/HKT superfamily of proteins that are present in bacteria (Ktr and TrK), fungi  
54 (TrK) and plants (HKT) (Sentenac and Bonneaud 1992; Corratgé-Faillie *et al.* 2010).

55

56 These plant HKTs are divided into 2 clades: 1) class 1 HKT proteins (HKT1;x) are  
57 mostly  $\text{Na}^+$ -selective transporters; 2) whereas class 2 HKTs (HKT2;y) mostly function  
58 as  $\text{K}^+$ - $\text{Na}^+$  symporters and so far have been only identified in cereal monocots (Asins  
59 *et al.* 2013; Waters *et al.* 2013). This definition has been challenged on occasion, such  
60 as for OsHKT2;4 following its characterization in *Xenopus laevis* oocytes, where  
61 there are conflicting reports on its permeability to  $\text{Ca}^{2+}$ ,  $\text{Mg}^{2+}$  and  $\text{NH}_4^+$  in addition to  
62  $\text{K}^+$  and  $\text{Na}^+$  (Lan *et al.* 2010; Horie *et al.* 2011; Sassi *et al.* 2012). Furthermore, there  
63 are two reports of  $\text{K}^+$  permeability in the HKT1 clade. Firstly, Arabidopsis AtHKT1  
64 could complement  $\text{K}^+$  transport deficient *E. coli* although no  $\text{K}^+$  permeability could be  
65 found when it was expressed in *X. laevis* oocytes in the same study (Uozumi *et al.*,  
66 2000). Secondly, *Eucalyptus camaldulensis* EchKT1;1 and EchKT1;2, which appear  
67 to be the exception for the HKT1 proteins characterized so far in that as they transport  
68 both  $\text{Na}^+$  and  $\text{K}^+$  when expressed in *X. laevis* oocytes (Liu *et al.* 2001). Other HKT1  
69 transporters have no reported  $\text{K}^+$  permeability (Uozumi *et al.* 2000; Mäser *et al.* 2002;  
70 Platten *et al.* 2006; Jabnune *et al.* 2009; Cotsaftis *et al.* 2012; Munns *et al.* 2012;  
71 Waters *et al.* 2013; Byrt *et al.* 2014; Campbell *et al.* 2017; Henderson *et al.*, 2018).

72

73 Whilst  $K^+$  transport is not a common feature of HKT1 transporters, several have  
74 shown the property of  $K^+$ -regulated  $Na^+$  transport (Ben Amar *et al.* 2013; Almeida *et*  
75 *al.* 2014a; Almeida *et al.* 2014b; Byrt *et al.* 2014). For instance, the presence of 10  
76 mM external  $K^+$  ( $[K^+]_{ext}$ ) reduced the inward  $Na^+$  current of *X. laevis* oocytes  
77 expressing *HKT1;5* from *T. aestivum* (*TaHKT1;5-D*) at -140 mV (Byrt *et al.* 2014),  
78 and the outward  $Na^+$  current of that expressing *HKT1;2* from *Solanum lycopersicum*  
79 (*SlHKT1;2*) (Almeida *et al.* 2014a). Interestingly,  $[K^+]_{ext}$  stimulated both inward and  
80 outward  $Na^+$  transport of *X. laevis* oocytes expressing two *HKT1;4* alleles from  
81 *Triticum turgidum* L. subsp. *durum* when assayed with solutions of very low ionic  
82 strength (Ben Amar *et al.* 2013).

83

84 Ktr/TrK/HKT proteins are predicted to consist of 8 transmembrane domains that fold  
85 into 4 pseudo-tetramers around a central pore (Mäser *et al.*, 2002; Cotsaftis *et al.*,  
86 2012; Xu *et al.*, 2018). The selectivity filter lining the pore of Ktr and TrK and class 2  
87 HKT proteins is predicted to be composed of four glycine residues. In class 1 HKTs  
88 the first glycine within the predicted selectivity filter is substituted with a serine  
89 (Mäser *et al.*, 2002); the lack of  $K^+$  permeability in this clade has been linked to the  
90 presence of this glycine (Uozumi *et al.*, 2000; Mäser *et al.*, 2002; Platten *et al.*, 2006;  
91 Cotsaftis *et al.*, 2012; Waters *et al.*, 2013); but the exact mechanism underlying this  
92 block is to be determined.

93

94 Here, we further characterise HKT1;5 proteins underlying two major salt tolerance  
95 associated loci, *TmHKT1;5-A* (*Nax2*) and *TaHKT1;5-D* (*Kna1*) from *T. monococcum*  
96 and *T. aestivum* respectively. We find that both *TmHKT1;5-A* and *TaHKT1;5-D*  
97 encode dual affinity  $Na^+$ -transporters and that their dual affinity  $Na^+$  transport can be  
98 blocked by raising external  $K^+$  concentration, and we propose the residues within the  
99 selectivity filter that cause this block. This is the first report that  $Na^+$  transport has two  
100 affinities in the HKT1 clade and demonstrates that dual affinity transport is a common  
101 property of both clades of the HKT family.

102

103

104

105

106 **Results**

107 **K<sup>+</sup> sensitivity of TmHKT1;5-A and TaHKT1;5-D**

108 Previously, it was shown that inward Na<sup>+</sup> transport for both TmHKT1;5-A and  
109 TaHKT1;5-D was inhibited by external K<sup>+</sup> (Munns *et al.* 2012; Byrt *et al.* 2014).  
110 Here, we further compared the K<sup>+</sup>-sensitivity of between TmHKT1;5-A and  
111 TaHKT1;5-D (Fig. 1). An increase in [K<sup>+</sup>]<sub>ext</sub> to 30 mM reduced the channel  
112 conductance of TmHKT1;5-A at -140 mV by approximately 75% in a 1 mM Na<sup>+</sup>  
113 ([Na<sup>+</sup>]<sub>ext</sub>) bath solution; similarly this amount of K<sup>+</sup> inhibited that of TaHKT1;5-D up  
114 to 95 % (Fig. 1A, B and Fig. 2). However, such Na<sup>+</sup>-inhibition by K<sup>+</sup> was gradually  
115 decreased by increasing [Na<sup>+</sup>]<sub>ext</sub> (Fig 1 and 2). For instance, 10 mM [K<sup>+</sup>]<sub>ext</sub> suppressed  
116 the channel conductance of TmHKT1;5-A by 43.5% in 1 mM [Na<sup>+</sup>]<sub>ext</sub> and by 16.5%  
117 in 10 mM [Na<sup>+</sup>]<sub>ext</sub>; it similarly reduced the TaHKT1;5-D conductance by 57% in 1  
118 mM [Na<sup>+</sup>]<sub>ext</sub> and by 23% in 10 mM [Na<sup>+</sup>]<sub>ext</sub> (Fig. 1 and 2). When [Na<sup>+</sup>]<sub>ext</sub> was  
119 increased to 30 mM, the channel conductance of TmHKT1;5-A was insensitive to  
120 [K<sup>+</sup>]<sub>ext</sub>, whereas that of TaHKT1;5-D was still inhibited (Fig. 2).

121

122 The increase in [K<sup>+</sup>]<sub>ext</sub> from 0 to 10 mM did not significantly change the reversal  
123 potential of TmHKT1;5-A or TaHKT1;5-D; all reversal potentials were close to the  
124 theoretical equilibrium potential for Na<sup>+</sup> under all conditions (Fig. 3A,B). Moreover,  
125 the observed shift in reversal potential was close to the theoretical Nernst shift for Na<sup>+</sup>  
126 regardless of the presence or absence of 10 mM [K<sup>+</sup>]<sub>ext</sub> (Fig. 3). This suggests that  
127 neither of protein were permeable to K<sup>+</sup>.

128

129 **Dual affinity transport of Na<sup>+</sup> by TmHKT1;5-A and TaHKT1;5-D**

130 The affinity for Na<sup>+</sup> transport of TmHKT1;5-A was previously reported to be ~4-fold  
131 higher than the Na<sup>+</sup>-transport affinity of TaHKT1;5-D (Munns *et al.* 2012; Byrt *et al.*  
132 2014; Xu *et al.* 2018), which we confirm here (Fig. 4A,B). On closer examination, we  
133 found a property that has not been described before. When lower concentrations of  
134 [Na<sup>+</sup>]<sub>ext</sub> were present it was clear that the concentration dependence of inward Na<sup>+</sup>  
135 currents could be fitted by two components, for both TmHKT1;5-A and TaHKT1;5-D  
136 (Fig. 4). Whilst both components were saturable, the concentration at which both  
137 phases saturated were greater for TaHKT1;5-D compared to TmHKT1;5-A (Fig.  
138 4A,B). For TmHKT1;5-A, the high affinity component of Na<sup>+</sup> transport had a K<sub>m</sub> of  
139 34 μM ± 26 μM when [Na<sup>+</sup>]<sub>ext</sub> was below 0.1 mM (K<sub>m</sub> (< 0.1 Na)), whereas at

140 concentrations of  $\text{Na}^+$  above 0.1 mM the  $K_m$  was  $1.04 \pm 0.17$  mM ( $K_m (> 0.1 \text{ Na})$ ) (Fig.  
141 4A). The  $K_m$  for the higher affinity component of inward  $\text{Na}^+$  transport for  
142 TaHKT1;5-D was  $29 \mu\text{M} \pm 4 \mu\text{M}$  when  $[\text{Na}^+]_{\text{ext}}$  was lower than 0.5 mM ( $K_m (< 0.5 \text{ Na})$ ),  
143 whilst the lower affinity phase had a  $K_m$  of  $4.32 \pm 0.5$  mM when  $[\text{Na}^+]_{\text{ext}}$  was higher  
144 than 0.5 mM ( $K_m (> 0.5 \text{ Na})$ ) (Fig. 4B).

145

146 We examined the extent of  $\text{K}^+$ -inhibition of both the lower and higher affinity  
147 components of the inward  $\text{Na}^+$  currents when  $[\text{K}^+]_{\text{ext}}$  was 10 mM. The (normalised)  
148 inward  $\text{Na}^+$  current catalysed by both proteins was significantly suppressed by 10 mM  
149  $[\text{K}^+]_{\text{ext}}$ , resulting in negligible inward  $\text{Na}^+$  transport by TmHKT1;5-A in presence of  
150  $[\text{Na}^+]_{\text{ext}}$  below 0.1 mM, or by TaHKT1;5-D in presence of  $[\text{Na}^+]_{\text{ext}}$  below 0.5 mM  
151 (Fig. 4C and D). In the presence of 10 mM  $[\text{K}^+]_{\text{ext}}$  it was now possible to fit the  
152 concentration dependence of inward current through TmHKT1;5-A and TaHKT1;5-D  
153 with one component. The  $K_m$  of both TmHKT1;5-A and TaHKT1;5-D were decreased  
154 approximately by 3-fold by 10 mM  $[\text{K}^+]_{\text{ext}}$  (Fig. 4E and F).

155

### 156 **Structural modelling of TaHKT1;5-D**

157 Three-dimensional structural models of TaHKT1;5-D were generated to explore why  
158  $\text{K}^+$  does not traverse the pore but instead blocks the  $\text{Na}^+$  currents, using the KtrB  $\text{K}^+$   
159 transporter from *B. subtilis* as a template (Vieira-Pires *et al.*, 2013; Xu *et al.*, 2018).  
160 The KtrB  $\text{K}^+$  protein was crystallised in the presence of KCl, hence the original  
161 structure contained a  $\text{K}^+$  ion in the selectivity filter region. This ion was substituted by  
162  $\text{Na}^+$  during modelling of TaHKT1;5-D as it transports  $\text{Na}^+$  but not  $\text{K}^+$  (Xu *et al.*,  
163 2018). Ramachandran analysis indicated that the template and TaHKT1;5-D models  
164 generated in complex with  $\text{Na}^+$ , and  $\text{K}^+$  had satisfactory stereo-chemical quality;  
165 Ramachandran plots showed only two residues positioned in disallowed regions  
166 (0.5% of all residues, except G and P residues). Average G-factors (measures of  
167 correctness of dihedral angles and main-chain covalent forces of protein molecules)  
168 calculated by PROCHECK of the template and TaHKT1;5-D models with  $\text{K}^+$  and  $\text{Na}^+$   
169 were 0.06, -0.18 and -0.13, respectively. The ProSa 2003 analysis of z-scores (-8.4; -  
170 6.0 and -5.8) indicated that template and modelled structures with  $\text{K}^+$  and  $\text{Na}^+$  had  
171 acceptable conformational energies.

172

173 The TaHKT1;5-D model showed that the  $\text{Na}^+$  ion is penta-hedrally coordinated with

174 V76, S77, S78, N231, C232 and H351 (all carbonyl oxygens), that lie near the  
175 selectivity filter residues S78, G233, G353 and G457 (Fig. 5A). Notably, the carbonyl  
176 oxygen one of the selectivity filter residues (S78) directly participates in Na<sup>+</sup> binding  
177 (Fig. 5A). Conversely, the K<sup>+</sup> ion is hexa-hedrally coordinated with V76, N231,  
178 C232, H351, N455 and V456, that also closely neighbour the selectivity filter residues  
179 (Fig. 5B); here none of the selectivity filter residues participate in direct binding of  
180 K<sup>+</sup>. The ionic distances of residues neighbouring Na<sup>+</sup> and K<sup>+</sup> ions are within similar  
181 ranges: for Na<sup>+</sup> they are between 2.3 and 2.4 Å; for K<sup>+</sup> they are between 2.6 and 2.9 Å  
182 (Fig. 5, right panels).

183

## 184 **Discussion**

185 Oocytes expressing *TmHKT1;5-A* or *TaHKT1;5-D* have been previously reported to  
186 undergo no obvious change in their reversal potential regardless of the presence or  
187 absence of K<sup>+</sup> in bath solution. Interestingly, both transporters had differential  
188 sensitivity to external [K<sup>+</sup>]<sub>ext</sub>. Whilst K<sup>+</sup> block occurs for TmHKT1;5-A catalysing  
189 inward transport it was not evident at [Na<sup>+</sup>]<sub>ext</sub> above 10 mM, whereas this blockage  
190 did happen for TaHKT1;5-D up to 30 mM [Na<sup>+</sup>]<sub>ext</sub> (Fig. 2) (Munns *et al.* 2012; Byrt  
191 *et al.* 2014). This differential inhibition effect of K<sup>+</sup> upon Na<sup>+</sup> transport at high  
192 [Na<sup>+</sup>]<sub>ext</sub> by TaHKT1;5-D may result from a range of factors, that govern the rates of  
193 Na<sup>+</sup> and K<sup>+</sup> ion binding and subsequent Na<sup>+</sup> transport. A variety of factors could  
194 control the transport of Na<sup>+</sup> and preliminary displacement of competing K<sup>+</sup> with a  
195 consequent energetic cost, before Na<sup>+</sup> passes bare or less-well hydrated than  
196 competing K<sup>+</sup>. Examples include free-energy variations between ions in binding sites  
197 relative to the corresponding quantity in bulk water, differences in selectivity filters  
198 solvent exposures (or dielectric constants), overall pore rigidity/stiffness (Dudev and  
199 Lim 2010), structural changes within funnels and selectivity filters due to residue re-  
200 orientation, differences in the hydration (coordination) numbers of Na<sup>+</sup> and K<sup>+</sup> (Na<sup>+</sup>  
201 and K<sup>+</sup> bind six and seven water molecules, respectively (Rowley and Roux 2012)  
202 and the alterations on the rates of Na<sup>+</sup> or K<sup>+</sup> de-solvation (Degrève *et al.* 1996). It is  
203 therefore plausible to expect that both ions would compete for binding sites within  
204 HKT funnel regions, yielding ion-protein binding sites with differential binding  
205 strengths.

206

207 Here, we refine the previous structural models of HKT1;5 to show that they contain a  
208 pore that allows the passage of Na<sup>+</sup> but not K<sup>+</sup> (Cotsaftis *et al.*, 2012; Waters *et al.*,  
209 2013; Xu *et al.*, 2018). This is consistent with the functional observations in this and  
210 previous studies (Munns *et al.* 2012; Byrt *et al.* 2014). Previously it was suggested  
211 that the Gly-Gly-Gly-Gly motif is important in coordinating the K<sup>+</sup> ion in Ktr/TrK  
212 transporters and in conferring dual Na<sup>+</sup>-K<sup>+</sup> transport in HKT2 transporters (Durrell  
213 and Guy, 1999; Mäser *et al.* 2002). Here our modelling suggests that the serine residue  
214 within the Ser-Gly-Gly-Gly selectivity motif directly interacts and binds with Na<sup>+</sup> (Fig  
215 5B). Furthermore, our model suggests, despite ionic distances being shorter for Na<sup>+</sup>  
216 than those for K<sup>+</sup>, that K<sup>+</sup> could be bound more strongly due to a higher coordination  
217 pattern (Fig. 5A and 5B-right panels). Obviously, during binding, K<sup>+</sup> takes an  
218 advantage of its larger ionic radius: 152 picometer (pm), compared to that of Na<sup>+</sup> (116  
219 pm); these parameters reflect empirical atomic radii of K (220 pm) and Na (180 pm).  
220 We assume that under the high concentrations of K<sup>+</sup>, this ion may outcompete Na<sup>+</sup> and  
221 would become bound in the selectivity filter, thus effectively blocking Na<sup>+</sup> transport.  
222 This is illustrated by calculating permeation channels in both complexes, using the  
223 Mole Voronoi algorithm, that predicts permeation trajectories and identifies path  
224 bottlenecks. From the calculated permeation paths, it could be deduced that the K<sup>+</sup> ion  
225 effectively blocks the permeation channel through the major gating protein pore,  
226 contrary to Na<sup>+</sup>. It is also obvious that Na<sup>+</sup> is likely to enter and exit the permeation  
227 trajectory from several points on both sides of the transporter, but always by-passes  
228 the selectivity filter constriction. Both ions arrive at the funnel of HKT proteins in  
229 solvated (hydrated) forms. While the hydration number for Na<sup>+</sup> is 6, that for K<sup>+</sup> is 7 at  
230 ambient temperature (Rowley and Roux 2012; Ma, 2016). The significance of the  
231 seven-fold water coordination for K<sup>+</sup> is that this solvated complex may form a  
232 stronger hydrogen-bond interaction pattern (in funnels of HKT proteins), and would  
233 be de-solvated with a higher energy input and thus slower) than the Na<sup>+</sup> solvated  
234 complex (Degrève *et al.*, 1996). It is also plausible to expect that both solvated ion  
235 complexes would compete for binding sites within HKT funnel regions with different  
236 binding strengths. All in all, this would contribute to the blockage of the pore entry of  
237 HKT transporters.

238

239 Potassium permeability for HKT1 transporters has only been reported once for the  
240 proteins that have been characterised in *X. laevis* oocytes. The transporters EchKT1;1



241 and EcHKT1;2 allow permeation of both  $K^+$  and  $Na^+$  (Liu *et al.*, 2001). Interestingly,  
242 when 3D models of the  $Na^+$  selective OsHKT1;5 and  $K^+$  permeable EcHKT1;2 were  
243 constructed and compared the pore size was predicted to be 0.2 Å larger in EcHKT1;2  
244 (than OsHKT1;5 and TaHKT1;5-D), which would more than account for the weaker  
245 interactions with  $K^+$  and allow this larger ion to pass through the pore (Waters *et al.*,  
246 2013). Without 3D modelling of each and every transporter in the HKT family to  
247 show how the selectivity filter forms in the context of the rest of the protein it would  
248 not be possible to predict which other HKT1s may allow passage of  $K^+$ . Predictions  
249 based on sequence alone are insufficient to predict how the two sets of proteins  
250 evolved their individual  $Na^+$  and  $K^+$  transport characteristics. An extension of the  
251 model to include other HKT proteins, a greater survey of structure-function  
252 relationships and mutations of key residues to predict functionally relevant residues  
253 and evolutionary relationships will be the focus of further study.

254

255 Two affinity ranges for  $Na^+$  transport have been detected in the HKT family  
256 previously, but only for HKT2 transporters. OsHKT2;1, OsHKT2;2, OsHKT2;4 and  
257 HvHKT2;1 (Schachtman and Schroeder 1994; Rubio *et al.* 1995; Jabnune *et al.* 2009;  
258 Yao *et al.* 2010; Horie *et al.* 2011; Sassi *et al.* 2012). For instance, for OsHKT2;2,  
259 when  $K^+$  is present, the transport of  $Na^+$  is  $K^+$ -dependent and displays a high affinity  
260 ( $K_m = 0.077$  mM), whereas showing a lower affinity when absence of  $K^+$  ( $K_m = 16$   
261 mM) (Rubio *et al.* 1995; Yao *et al.* 2010). OsHKT2;1 also acquires two phases of  
262  $Na^+$ -transport affinity, whose  $K_m$  for  $Na^+$  is respectively 9.5 μM at  $[Na^+]_{ext}$  below 1  
263 mM and is 2.2 mM at  $[Na^+]_{ext} > 1$  mM (Jabnune *et al.* 2009). The  $K^+$  transport  
264 catalysed by HvHKT2;1 is affected by both  $[Na^+]_{ext}$  and  $[K^+]_{ext}$ , such as a decrease in  
265 its  $K^+$  transport affinity from 30 μM down to 3.5 mM by  $[Na^+]_{ext}$  increased from 0.5  
266 mM to 30 mM and a greatly reduced channel conductivity for  $K^+$  by increasing  $[K^+]_{ext}$   
267 above ~3 mM (Mian *et al.* 2011). This is the first time that dual affinity characteristics  
268 have been reported for the HKT1;x family (Fig. 4). Considering the considerably  
269 homology between both clades (58% similarity/41% identity between TaHKT1;5 and  
270 TaHKT2;1) it is perhaps not surprising that both clades can confer dual affinity  
271 transport. How such ability is conferred structurally is still to be determined.

272

273 In summary, whilst the high-affinity component was similarly inhibited by 10 mM  
274  $[K^+]_{ext}$  for both TaHKT1;5-D and TmHKT1;5-A, the low affinity component of  $Na^+$

275 transport for TmHKT1;5-A was less inhibited by external K than TaHKT1;5-D (Fig.  
276 4). Furthermore, both wheat HKT1;5 proteins facilitate Na<sup>+</sup> uptake at high affinity;  
277 TmHKT1;5-A facilitates Na<sup>+</sup> uptake with a higher affinity than TaHKT1;5-D  
278 regardless the absence or presence of [K<sup>+</sup>]<sub>ext</sub>, (Fig. 4) (Munns *et al.* 2012; Byrt *et al.*  
279 2014). TmHKT1;5-A has been shown to be more effective in conferring shoot Na<sup>+</sup>  
280 exclusion to wheat compared to TaHKT1;5-D (James *et al.*, 2012). We propose that  
281 the higher affinity (with half-maximal activity nearer 1 mM compared to 4 mM), and  
282 a lower sensitivity to [K<sup>+</sup>]<sub>ext</sub> are both characteristics that can help confer better shoot  
283 Na<sup>+</sup> exclusion, which is a property that can lead to greater salt tolerance in the field  
284 for wheat (James *et al.* 2011; James *et al.* 2012; Munns *et al.* 2012).

285

## 286 **Materials and Methods**

287 Brief methods for cloning of *TmHKT1;5-A* and *TaHKT1;5-D* as well as its functional  
288 characterisation in heterologous expression systems were described Munns *et al.*  
289 (Munns *et al.* 2012) and Byrt *et al.* (Byrt *et al.* 2014). Further details are included  
290 here.

291

## 292 **Two-electrode voltage clamp recording in *X. laevis* oocytes**

293 Oocyte recording followed the methods as described in Munns *et al.* (Munns *et al.*  
294 2012) and Byrt *et al.* (Byrt *et al.* 2014). Briefly, 46 nl/23 ng of cRNA or equal  
295 volumes of RNA-free water were injected into oocytes, followed by an incubation for  
296 48 h before recording. Membrane currents were recorded in the HMg solution (6 mM  
297 MgCl<sub>2</sub>, 1.8 mM CaCl<sub>2</sub>, 10 mM MES and pH 6.5 adjusted with a TRIS base) ± Na<sup>+</sup>  
298 glutamate and/or K<sup>+</sup> glutamate as indicated. All solution osmolarities were adjusted  
299 using mannitol at 220-240 mOsmol kg<sup>-1</sup>.

300

## 301 **Construction of 3D models of TaHKT1;5D in complex with Na<sup>+</sup> and K<sup>+</sup> ions**

302 The most suitable template for TaHKT1;5D, the KtrB K<sup>+</sup> transporter from *B. subtilis*  
303 (Protein Data Bank accession 4J7C, chain I) (Vieira-Pires *et al.*, 2013), was identified  
304 as previously described (Xu *et al.*, 2017). The KtrB K<sup>+</sup> protein was crystallised in the  
305 presence of KCl, hence the structure contains a K<sup>+</sup> ion in the selectivity filter region.  
306 This ion was substituted by Na<sup>+</sup> during modelling of TaHKT1;5D that transport Na<sup>+</sup> at  
307 a greater rate than K<sup>+</sup> (Xu *et al.*, 2017). 3D structural models in complex with Na<sup>+</sup>, and  
308 K<sup>+</sup> were generated using Modeller 9v16 (Sali and Blundell, 1993) on a Linux station

309 running the Fedora 12 operating system, as previously described (Cotsaftis et al.,  
310 2012, Waters et al., 2013, Xu et al., 2017). During modelling, attention was paid to  
311 ionic radii of Na<sup>+</sup>, and K<sup>+</sup>, whose topology parameters were taken from CHARMM  
312 (Brooks et al., 2009). In each case, a total of 100 models were generated that were  
313 scored by Modeller using the modeller objective function (Shen and Sali, 2006), the  
314 discrete optimised protein energy function (Eswar et al., 2008), PROCHECK  
315 (Laskowski et al., 1993), ProSa 2003 (Sippl, 1993) and FoldX (Schymkowitz et al.,  
316 2005). Best scoring models constructed in Modeller 9v19 were further subjected to  
317 energy minimisation (knowledge-based Yasara2 forcefield with parameters for bond  
318 distances, planarity of peptide bonds, bond angles, Coulomb terms, dihedral angles,  
319 and van der Waals forces) (Krieger et al., 2004) combined with the particle-mesh-  
320 Ewald (PME) energy function for long range electrostatics (cutoff 8.0 Å), to obtain  
321 smoothed electrostatic potentials. Structural images were generated with PyMOL  
322 Molecular Graphics System V1.8.2.0 (Schrödinger LLC, Portland, OR, USA).

323

#### 324 **Funding**

325 This work was supported by funding to M.G. from the Grains Research and  
326 Development Corporation (UA00145, M.G.), and Australian Research Council  
327 through the Centre of Excellence (CE1400008) and Future Fellowship  
328 (FT130100709) schemes.

329

330

## 331 References

- 332 Almeida, P, de Boer, G-J, de Boer, AH (2014a) Differences in shoot  $\text{Na}^+$   
333 accumulation between two tomato species are due to differences in ion affinity  
334 of HKT1;2. *Journal of Plant Physiology* **171**, 438-447.
- 335 Almeida, P, Feron, R, de Boer, G-J, de Boer, AH (2014b) Role of  $\text{Na}^+$ ,  $\text{K}^+$ ,  $\text{Cl}^-$ ,  
336 proline and sucrose concentrations in determining salinity tolerance and their  
337 correlation with the expression of multiple genes in tomato. *AoB Plants* **6**,  
338 plu039.
- 339 Asins, MJ, Villalta, I, Aly, MM, Olias, R, Álvarez De Morales, P, Huertas, R, Li, J,  
340 JAIME-PÉREZ, N, Haro, R, Raga, V (2013) Two closely linked tomato HKT  
341 coding genes are positional candidates for the major tomato QTL involved in  
342  $\text{Na}^+/\text{K}^+$  homeostasis. *Plant, Cell & Environment* **36**, 1171-1191.
- 343 Ben Amar, S, Brini, F, Sentenac, H, Masmoudi, K, Véry, A-A (2013) Functional  
344 characterization in *Xenopus* oocytes of  $\text{Na}^+$  transport systems from durum  
345 wheat reveals diversity among two HKT1; 4 transporters. *Journal of*  
346 *experimental botany* **65**, 213-222.
- 347 Byrt, CS, Xu, B, Krishnan, M, Lightfoot, DJ, Athman, A, Jacobs, AK, Watson-Haigh,  
348 NS, Plett, D, Munns, R, Tester, M (2014) The  $\text{Na}^+$  transporter, TaHKT1;5-D,  
349 limits shoot  $\text{Na}^+$  accumulation in bread wheat. *Plant Journal* **80**, 516-526.
- 350 Campbell, MT, Bandillo, N, Al Shiblawi, FRA, Sharma, S, Liu, K, Du, Q, Schmitz,  
351 AJ, Zhang, C, Véry, A-A, Lorenz, AJ (2017) Allelic variants of OsHKT1; 1  
352 underlie the divergence between indica and japonica subspecies of rice (*Oryza*  
353 *sativa*) for root sodium content. *PLoS genetics* **13**, e1006823.
- 354 Corratgé-Faillie, C, Jabnune, M, Zimmermann, S, Véry, A-A, Fizames, C, Sentenac,  
355 H (2010) Potassium and sodium transport in non-animal cells: the  
356 Trk/Ktr/HKT transporter family. *Cellular and Molecular Life Sciences* **67**,  
357 2511-2532.
- 358 Cotsaftis, O, Plett, D, Shirley, N, Tester, M, Hrmova, M (2012) A two-staged model  
359 of  $\text{Na}^+$  exclusion in rice explained by 3D modeling of HKT transporters and  
360 alternative splicing. *PLoS One* **7**, e39865.
- 361 Degrève, L, Vecchi, SM, Junior, CQ (1996) The hydration structure of the  $\text{Na}^+$  and  $\text{K}^+$   
362 ions and the selectivity of their ionic channels. *Biochimica et Biophysica Acta*  
363 *(BBA)-Bioenergetics* **1274**, 149-156.
- 364 Dudev, T, Lim, C (2010) Factors governing the  $\text{Na}^+$  vs  $\text{K}^+$  selectivity in sodium ion  
365 channels. *Journal of the American Chemical Society* **132**, 2321-2332.
- 366 Henderson SW, Dunlevy JD, Wu Y, Blackmore DH, Walker RR, Edwards EJ,  
367 Gilliham M, Walker AR (2018) Functional differences in transport properties  
368 of natural HKT1;1 variants influence shoot  $\text{Na}^+$  exclusion in grapevine  
369 rootstocks. *New Phytologist* **217**, 113-1127.
- 370 Horie, T, Brodsky, DE, Costa, A, Kaneko, T, Schiavo, FL, Katsuhara, M, Schroeder,  
371 JI (2011)  $\text{K}^+$  transport by the OsHKT2; 4 transporter from rice with atypical  
372  $\text{Na}^+$  transport properties and competition in permeation of  $\text{K}^+$  over  $\text{Mg}^{2+}$  and  
373  $\text{Ca}^{2+}$  ions. *Plant Physiology* **156**, 1493-1507.
- 374 Jabnune, M, Espeout, S, Mieulet, D, Fizames, C, Verdeil, J-L, Conéjéro, G,  
375 Rodríguez-Navarro, A, Sentenac, H, Guiderdoni, E, Abdelly, C (2009)  
376 Diversity in expression patterns and functional properties in the rice HKT  
377 transporter family. *Plant Physiology* **150**, 1955-1971.
- 378 James, RA, Blake, C, Byrt, CS, Munns, R (2011) Major genes for  $\text{Na}^+$  exclusion,  
379 *Nax1* and *Nax2* (wheat *HKT1; 4* and *HKT1; 5*), decrease  $\text{Na}^+$  accumulation in

- 380 bread wheat leaves under saline and waterlogged conditions. *Journal of*  
381 *experimental botany* **62**, 2939-2947.
- 382 James, RA, Blake, C, Zwart, AB, Hare, RA, Rathjen, AJ, Munns, R (2012) Impact of  
383 ancestral wheat sodium exclusion genes *Nax1* and *Nax2* on grain yield of  
384 durum wheat on saline soils. *Functional Plant Biology* **39**, 609-618.
- 385 James, RA, Davenport, RJ, Munns, R (2006) Physiological characterization of two  
386 genes for Na<sup>+</sup> exclusion in durum wheat, *Nax1* and *Nax2*. *Plant Physiology*  
387 **142**, 1537-1547.
- 388 Lan, W-Z, Wang, W, Wang, S-M, Li, L-G, Buchanan, BB, Lin, H-X, Gao, J-P, Luan,  
389 S (2010) A rice high-affinity potassium transporter (HKT) conceals a calcium-  
390 permeable cation channel. *Proceedings of the National Academy of Sciences,*  
391 *U.S.A.* **107**, 7089-7094.
- 392 Liu, W, Fairbairn, DJ, Reid, RJ, Schachtman, DP (2001) Characterization of two  
393 HKT1 homologues from *Eucalyptus camaldulensis* that display intrinsic  
394 osmosensing capability. *Plant Physiol.* **127**, 283-294.
- 395 Mäser, P, Hosoo, Y, Goshima, S, Horie, T, Eckelman, B, Yamada, K, Yoshida, K,  
396 Bakker, EP, Shinmyo, A, Oiki, S (2002) Glycine residues in potassium  
397 channel-like selectivity filters determine potassium selectivity in four-loop-  
398 per-subunit HKT transporters from plants. *Proceedings of the National*  
399 *Academy of Sciences, U.S.A.* **99**, 6428-6433.
- 400 Mian, A, Oomen, RJ, Isayenkov, S, Sentenac, H, Maathuis, FJ, Véry, AA (2011)  
401 Over-expression of an Na<sup>+</sup>-and K<sup>+</sup>-permeable HKT transporter in barley  
402 improves salt tolerance. *Plant Journal* **68**, 468-479.
- 403 Munns, R, James, RA, Xu, B, Athman, A, Conn, SJ, Jordans, C, Byrt, CS, Hare, RA,  
404 Tyerman, SD, Tester, M, Plett, D, Gilliam, M (2012) Wheat grain yield on  
405 saline soils is improved by an ancestral Na<sup>+</sup> transporter gene. *Nature*  
406 *Biotechnology* **30**, 360-364.
- 407 Munns, R, Gilliam, M (2015) Salinity tolerance of crops - What is the cost? *New*  
408 *Phytologist* **208**, 668-673.
- 409 Platten, JD, Cotsaftis, O, Berthomieu, P, Bohnert, H, Davenport, RJ, Fairbairn, DJ,  
410 Horie, T, Leigh, RA, Lin, H-X, Luan, S (2006) Nomenclature for HKT  
411 transporters, key determinants of plant salinity tolerance. *Trends in Plant*  
412 *Sciences* **11**, 372-374.
- 413 Ren, Z-H, Gao, J-P, Li, L-G, Cai, X-L, Huang, W, Chao, D-Y, Zhu, M-Z, Wang, Z-Y,  
414 Luan, S, Lin, H-X (2005) A rice quantitative trait locus for salt tolerance  
415 encodes a sodium transporter. *Nature Genetics* **37**, 1141-1146.
- 416 Rowley, CN, Roux, Bt (2012) The solvation structure of Na<sup>+</sup> and K<sup>+</sup> in liquid water  
417 determined from high level ab initio molecular dynamics simulations. *Journal*  
418 *of chemical theory and computation* **8**, 3526-3535.
- 419 Rubio, F, Gassmann, W, Schroeder, JI (1995) Sodium-driven potassium uptake by the  
420 plant potassium transporter HKT1 and mutations conferring salt tolerance.  
421 *Science* **270**, 1660.
- 422 Sassi, A, Mieulet, D, Khan, I, Moreau, B, Gaillard, I, Sentenac, H, Véry, A-A (2012)  
423 The rice monovalent cation transporter OsHKT2; 4: revisited ionic selectivity.  
424 *Plant Physiology* **160**, 498-510.
- 425 Schachtman, DP, Schroeder, JI (1994) Structure and transport mechanism of a high-  
426 affinity potassium uptake transporter from higher plants. *Nature* **370**, 655-658.
- 427 Sentenac, H, Bonneaud, N (1992) Cloning and expression in yeast of a plant  
428 potassium ion transport system. *Science* **256**, 663.

- 429 Uozumi, N, Kim, EJ, Rubio, F, Yamaguchi, T, Muto, S, Tsuboi, A, Bakker, EP,  
430 Nakamura, T, Schroeder, JI (2000) The Arabidopsis HKT1 gene homolog  
431 mediates inward Na<sup>+</sup> currents in *Xenopus laevis* oocytes and Na<sup>+</sup> uptake in  
432 *Saccharomyces cerevisiae*. *Plant Physiology* **122**, 1249-1260.
- 433 Waters, S, Gilliam, M, Hrmova, M (2013) Plant high-affinity potassium (HKT)  
434 transporters involved in salinity tolerance: structural insights to probe  
435 differences in ion selectivity. *International Journal of Molecular Sciences* **14**,  
436 7660-7680.
- 437 Xu, B, Waters, S, Byrt, CS, Plett, D, Tyerman, SD, Tester, M, Munns, R, Hrmova, M,  
438 Gilliam, M (2018) Structural variations in wheat HKT1; 5 underpin  
439 differences in Na<sup>+</sup> transport capacity. *Cellular and Molecular Life Sciences* 1-  
440 12.
- 441 Yao, X, Horie, T, Xue, S, Leung, H-Y, Katsuhara, M, Brodsky, DE, Wu, Y,  
442 Schroeder, JI (2010) Differential sodium and potassium transport selectivities  
443 of the rice OsHKT2; 1 and OsHKT2; 2 transporters in plant cells. *Plant*  
444 *Physiology* **152**, 341-355.
- 445
- 446

447 **Figures**

448 **Figure 1. K<sup>+</sup>-sensitivity of Na<sup>+</sup> currents carried by TmHKT1;5-A and**

449 **TaHKT1;5-D.** A-D, current-voltage (I/V) curves of Na<sup>+</sup> currents recorded from *X.*  
450 *laevis* oocytes expressing *TmHKT1;5-A* (A, C) and *TaHKT1;5-D* (B, D) in 1 mM Na<sup>+</sup>  
451 plus 0-30 mM K<sup>+</sup> (A,B), or 0-30 mM Na<sup>+</sup> solutions with or without 10 mM K<sup>+</sup> (C,D).  
452 Mean ± S.E.M, n = 5-6.

453

454 **Figure 2. Channel conductance of TmHKT1;5-A and TaHKT1;5-D.** The channel  
455 conductance of TmHKT1;5-A and TaHKT1;5-D was calculated from Figure 1, based  
456 on the slope of curve between -140 mV and -120 mV, statistical difference was  
457 determined by *Students' t-test*, \**P* < 0.05 and \*\* *P* < 0.01.

458

459 **Figure 3. Shift in reversal potential of TmHKT1;5-A and TaHKT1;5-D in**  
460 **response to changes in [Na<sup>+</sup>]<sub>ext</sub> and [K<sup>+</sup>]<sub>ext</sub>.**

461 A, Reversal potential of currents in *X. laevis* oocytes expressing *TmHKT1;5-A* and  
462 *TaHKT1;5-D* derived from Figure. 1. B, Reversal potential of Na<sup>+</sup> currents plotted  
463 against theoretical Nernst potential derived from internal concentrations measured in  
464 Munns et al. (2012) and Byrt et al., (2014) at the used.  
465 Nernst shift in oocytes expressing *TmHKT1;5-A* and *TaHKT1;5-D* from 1 mM to 10  
466 mM Na<sup>+</sup> ([1-10]<sub>ext</sub> Na<sup>+</sup>) and 10 mM to 30 mM Na<sup>+</sup> ([10-30]<sub>ext</sub> Na<sup>+</sup>) with or without 10  
467 mM [K<sup>+</sup>]<sub>ext</sub>, ΔExp.Na = experimentally measured shift in reversal potential for Na<sup>+</sup>, the  
468 theoretical equilibrium (or Nernst) potential for Na<sup>+</sup> was 57.7 mV and 26.9 mV,  
469 respectively for [1-10]<sub>ext</sub> Na<sup>+</sup> and [10-30]<sub>ext</sub> Na<sup>+</sup>, refers to Munns et al. (2012).

470

471 **Figure 4. Transport affinity of TmHKT1;5-A and TaHKT1;5-D in *X. laevis***  
472 **oocytes.**

473 A-B, dual Na<sup>+</sup>-transport affinity of TmHKT1;5-A and TaHKT1;5-D in *X. laevis*  
474 oocytes, plotted as normalised currents at -140 mV as shown against a series of Na<sup>+</sup>  
475 glutamate solutions. C-D, high affinity phase of TmHKT1;5-A and TaHKT1;5-D in  
476 absence and presence of 10 mM [K<sup>+</sup>]<sub>ext</sub>. Data represented in A, B and C as mean ±  
477 S.E.M (n = 5 for A, n = 4 for B, n = 7 for C). E-F, Na<sup>+</sup>-transport affinity of  
478 TmHKT1;5-A and TaHKT1;5-D in *X. laevis* oocytes, plotted as normalised currents  
479 at -140 mV as shown against a series of Na<sup>+</sup> glutamate solutions with an additional 10  
480 mM K<sup>+</sup> glutamate.

481

482 **Figure 5. Molecular models of TaHKT1;5D in complex with Na<sup>+</sup> (A) and K<sup>+</sup> (B)**  
483 **ions.**

484 **(A-B; left panels)** Cartoon representations of TaHKT1;5-D illustrate their overall  
485 protein folds with cylindrical  $\alpha$ -helices, and permeation channels (black mesh). Na<sup>+</sup>  
486 (A) and K<sup>+</sup> (B) ions are shown as purple spheres located within the selectivity filter  
487 residues S78, G233, G353 and G457 (coloured in cpk magenta), and other  
488 neighbouring residues. Na<sup>+</sup> is likely to enter and exit the permeation trajectory from  
489 several points on both sides of the transporter, but always by-passes the selectivity  
490 filter constriction. K<sup>+</sup> enters the selectivity filter and effectively blocks the gating  
491 trajectory.

492 **(A-B; right panels)** Detailed views of bound Na<sup>+</sup> and K<sup>+</sup> ions that interact through  
493 respective penta-hedral (yellow dashed lines) and hexa-hedral (green dashed lines)  
494 coordination patterns with residues adjoining the selectivity filter residues S78, G233,  
495 G353 and G457. The ionic distances of 2.3-2.8 Å for Na<sup>+</sup> between V76, S77, S78,  
496 N231, C232 and H351, and of 2.6-2.9 Å for K<sup>+</sup> between V76, N231, C232, H351,  
497 N455 and V456, are formed between carbonyl oxygens of these residues (in sticks in  
498 atomic colours), located near selectivity filter residues. The K<sup>+</sup> ion effectively blocks  
499 the permeation channel through the protein pore, contrary to Na<sup>+</sup>.

500



501 **Figure 1**

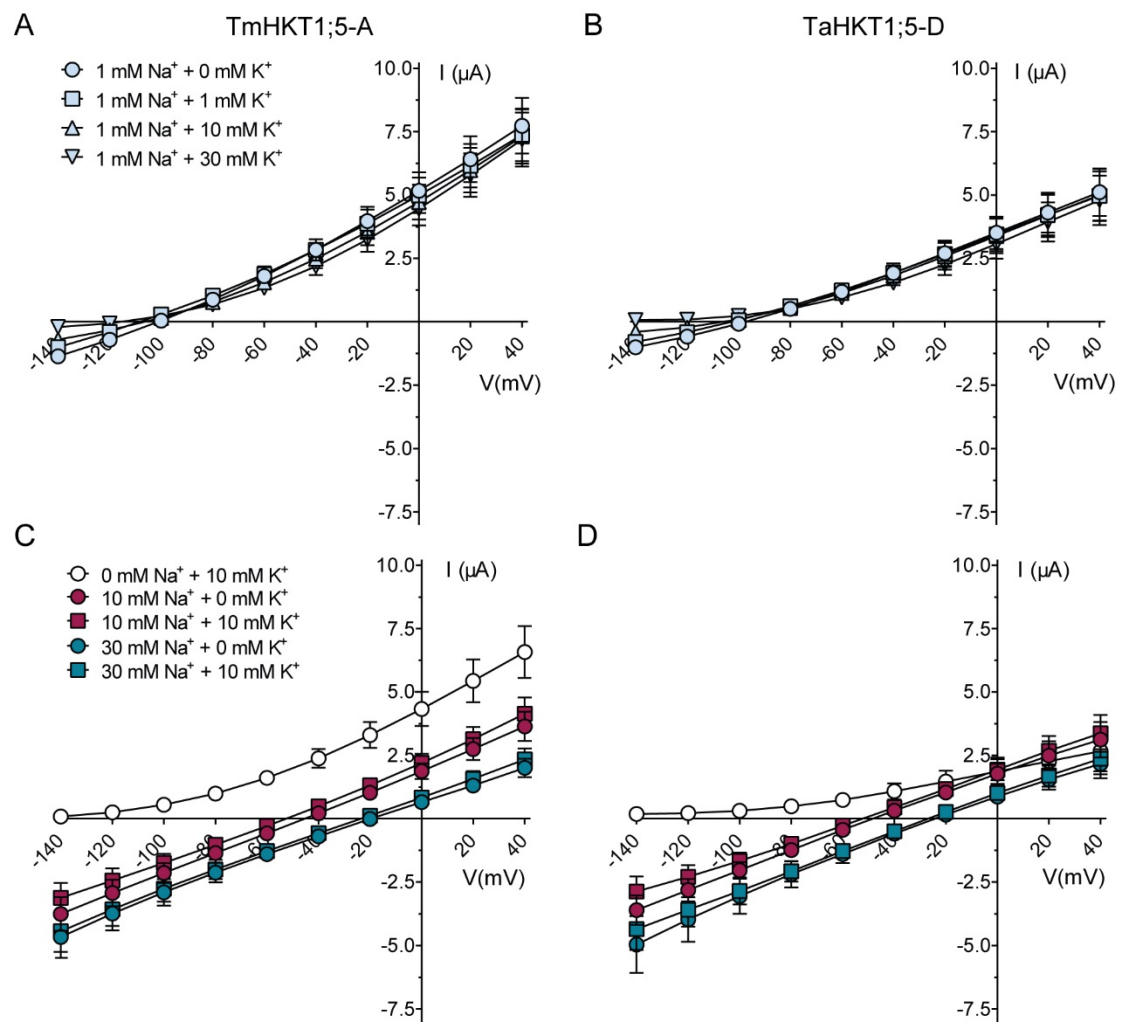

502

503

504

505 **Figure 2**

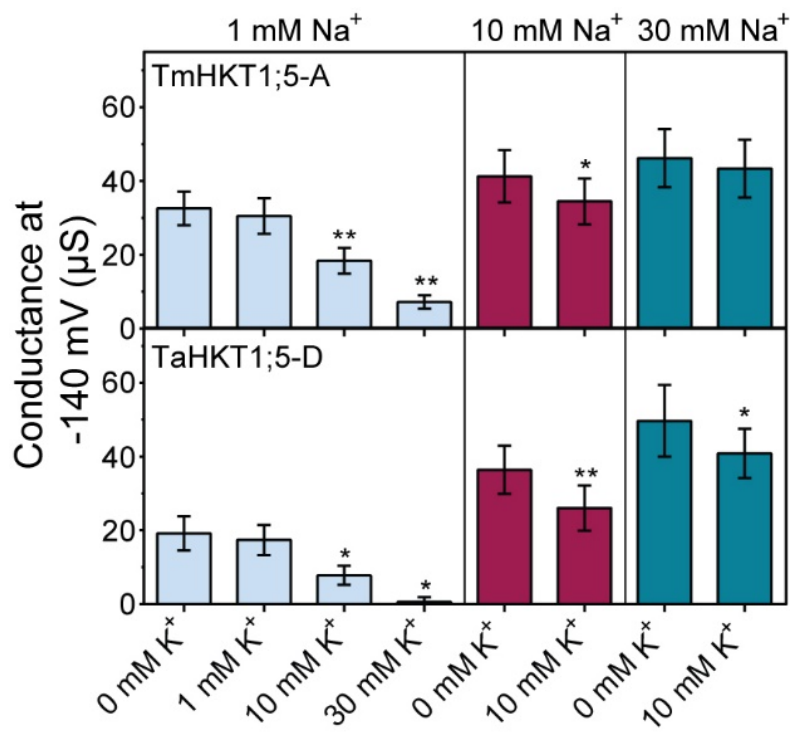

506

507

508 **Figure 3**

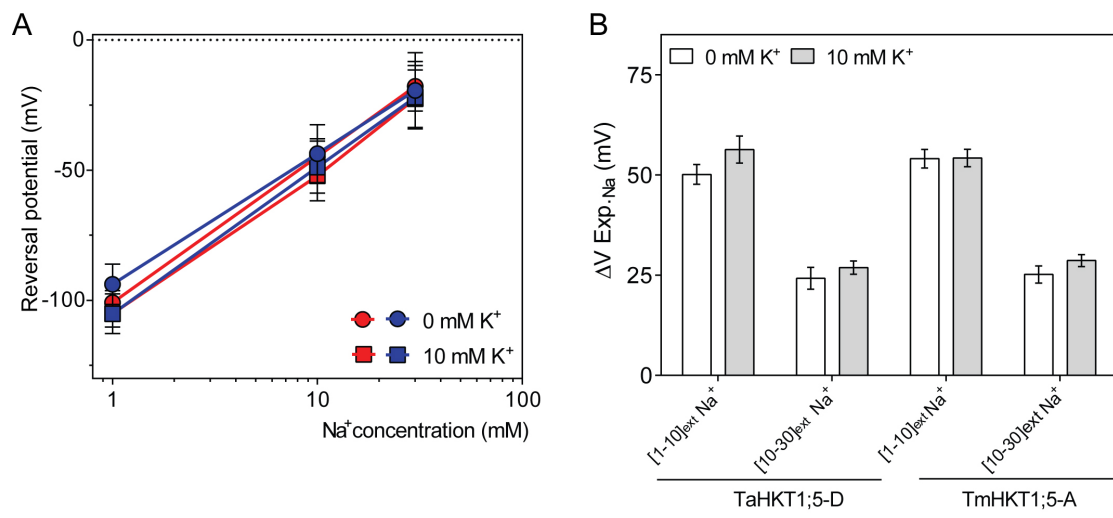

509

510

511 **Figure 4**

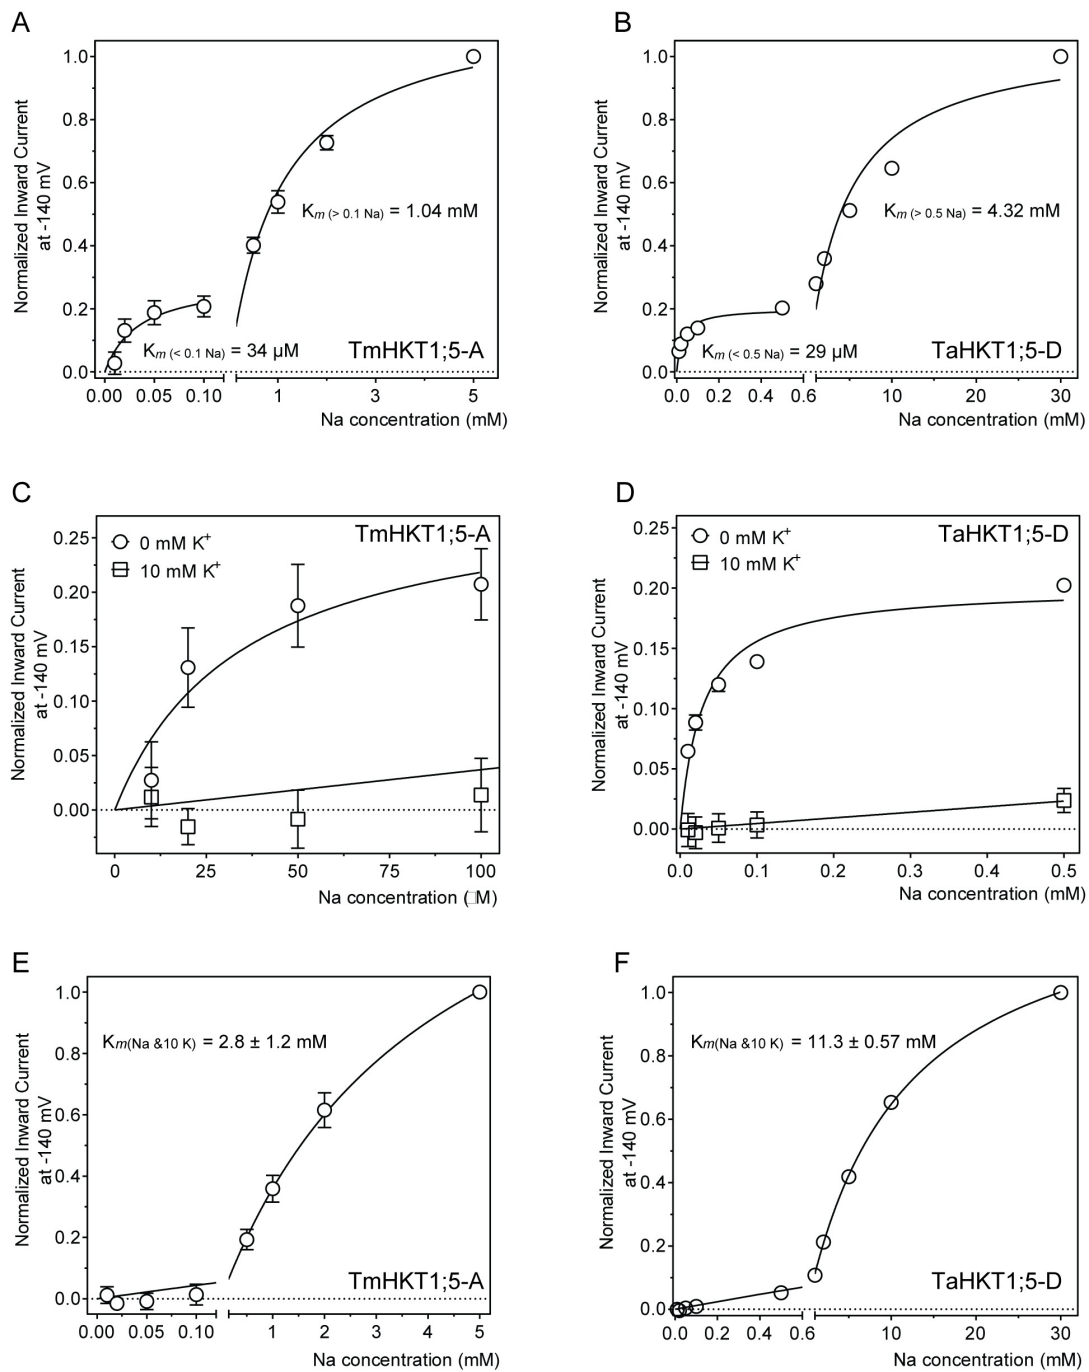

512

513

514

515 **Figure 5**

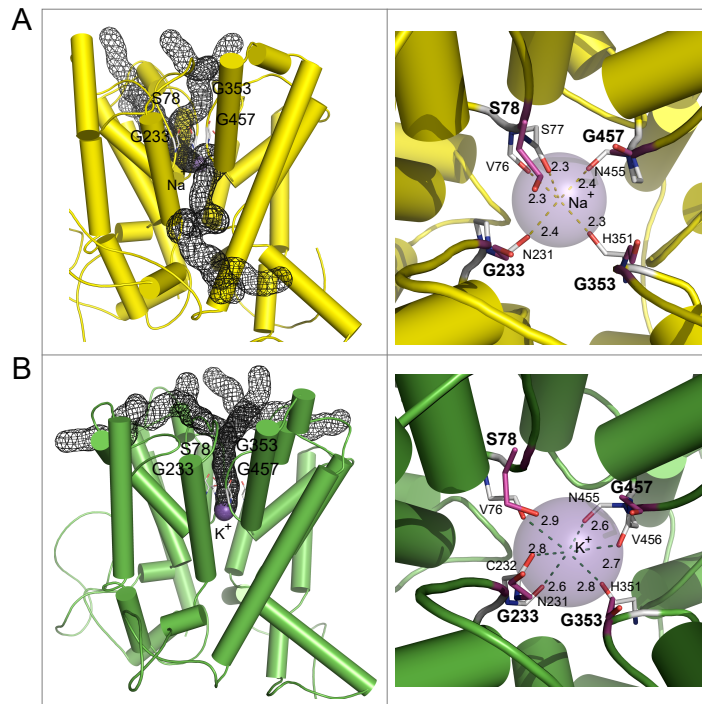

516  
517
